1 **Characterization of coral-associated microbial aggregates (CAMAs) within tissues**  
2 **of the coral *Acropora hyacinthus***

3  
4 Naohisa Wada<sup>1,2,7</sup>, Mizuki Ishimochi<sup>2,3</sup>, Taeko Matsui<sup>2</sup>, F. Joseph Pollock<sup>4,7,8</sup>, Sen-Lin Tang<sup>1</sup>,  
5 Tracy D. Ainsworth<sup>5</sup>, Bette L. Willis<sup>6,7</sup>, Nobuhiro Mano<sup>2, †</sup>, David G. Bourne<sup>6,7,9 †</sup>

6  
7 <sup>1</sup>Biodiversity Research Center, Academia Sinica, Nangang, Taipei, Taiwan  
8 <sup>2</sup>Department of Marine Science and Resources, College of Bioresource Science, Nihon  
9 University, Fujisawa, Kanagawa, Japan  
10 <sup>3</sup>Faculty of Science, University of the Ryukyus, Nishihara, Okinawa 903-0213, Japan  
11 <sup>4</sup>The Nature Conservancy, Caribbean Division, Coral Gables, FL 33134  
12 <sup>5</sup>School of Biological, Earth and Environmental Science, University of New South Wales,  
13 Sydney, NSW, Australia  
14 <sup>6</sup>College of Science and Engineering, James Cook University, Townsville, QLD, Australia  
15 <sup>7</sup>AIMS@JCU, Townsville, QLD, Australia  
16 <sup>8</sup>The Pennsylvania State University, State College, PA, USA  
17 <sup>9</sup>Australian Institute of Marine Science, Townsville, QLD, Australia

18  
19 †Equal correspond authors

20 Dr. Nobuhiro Mano ([mano.nobuhiro@nihon-u.ac.jp](mailto:mano.nobuhiro@nihon-u.ac.jp)) Department of Marine Science and  
21 Resources, College of Bioresource Science, Nihon University, Fujisawa, Kanagawa, 252-  
22 0813 Japan. Phone +81 466 84 3357

23 Dr. David G. Bourne ([david.bourne@jcu.edu.au](mailto:david.bourne@jcu.edu.au)) College of Science and Engineering, James  
24 Cook University, Townsville, QLD, 4811 Australia. Phone +61 7 47814790

25

26 **Kew Words:** Coral Microbiome, Coral Tissue, Bacterial Aggregates, Fluorescent *in*  
27 *situ* Hybridisation

28

29 **Abstract**

30 Bacterial diversity associated with corals has been studied extensively,  
31 however, localization of bacterial associations within the holobiont is still poorly  
32 resolved. Here we provide novel insight into the localization of coral-associated  
33 microbial aggregates (CAMAs) within tissues of the coral *Acropora hyacinthus* using  
34 histological and fluorescent *in situ* hybridization approaches. In total, 318 CAMAs were  
35 characterized and shown to be distributed extensively throughout coral tissues collected  
36 from five sites in Japan and Australia. Density of basophilic CAMAs was typically  
37 higher at inshore sites (20.13 per cm<sup>2</sup> at inshore sites in Okinawa, Japan; 5.43 per cm<sup>2</sup> at  
38 inner shelf sites in the northern Great Barrier Reef) than at offshore sites on the GBR (0  
39 to 1.1 per cm<sup>2</sup>). CAMAs were randomly distributed across the six coral tissue regions  
40 investigated. Within each CAMA, bacterial cells had similar morphological  
41 characteristics, but bacterial morphologies varied among CAMAs, with at least five  
42 distinct types identified. Identifying the location of microorganisms associated with the  
43 coral host is a prerequisite for understanding their contributions to fitness. Localization  
44 of tissue-specific communities housed within CAMAs is particularly important, as these  
45 communities are potentially important contributors to vital metabolic functions of the  
46 holobiont.

47

## 48 **Introduction**

49           Scleractinian corals associate with a broad consortia of microorganisms,  
50 including endosymbiont dinoflagellates (*Symbiodiniaceae*), protozoa, fungi, bacteria,  
51 archaea and viruses, which collectively are termed the coral holobiont<sup>1-3</sup>. The  
52 importance of symbiotic dinoflagellates in provisioning the coral host with essential  
53 nutrients through translocated photosynthates has been well established<sup>e.g.,4</sup>, however  
54 the roles of other microorganisms within the holobiont are less well understood. Some  
55 of the functions attributed to coral-associated microbiota include supply of essential  
56 nutrients and vitamins through processes such as nitrogen fixation<sup>5-8</sup> and metabolizing  
57 dimethylsulfoniopropionate (DMSP) to produce biologically important byproducts like  
58 dimethylsulfide<sup>9</sup>. The coral microbiome is also likely important for directly facilitating  
59 disease resistance through production of antimicrobials<sup>10,11</sup> or indirectly through  
60 microhabitat colonization that excludes opportunistic organism<sup>12,13</sup>.

61           Corals are considered simple metazoans, but despite their basal phylogenetic  
62 position, they nevertheless form complex three-dimensional structures. Anatomically,  
63 the coral polyp consists of an outer mucus layer, two cell layers containing  
64 endosymbiotic dinoflagellates (inner layer) and nematocysts (outer layer), an external  
65 calcium carbonate skeleton, and a gastrovascular system that includes the coelenteron  
66 and connecting channels<sup>14</sup>. Within all these microhabitat niches, bacteria can reside as  
67 either transient communities or established symbionts with putative functional roles that  
68 may be positive, neutral or negative to the coral holobiont<sup>15</sup>. A multitude of studies  
69 have reported on the diversity of the coral microbiome, in some cases finding conserved

70 microbial communities associated with some coral species, and in others finding  
71 shifting microbiomes that reflect varying geographic, temporal or health status patterns  
72 <sup>16–20</sup>. To understand the significance of coral microbiome associations, care must be  
73 exercised so that diversity patterns reflect the specific ecological niche that these  
74 communities inhabit, such as the surface mucus layer, tissue layers, and/or the skeleton  
75 <sup>21–28</sup>. Defining the locations of specific microorganisms is essential for elucidating the  
76 importance of their role within the holobiont. For example, mucus bacteria are more  
77 likely to have a loose association with the coral host, being sloughed off as the mucus is  
78 exuded from the corals <sup>29</sup>. Conversely tissue-associated microorganisms are potentially  
79 more integrated in shared metabolic pathways and may reside in specific associations  
80 with host coral as a consequence of potential host selection <sup>5,20</sup>.

81         To date, few studies have precisely localized bacterial communities within  
82 coral tissues. Studies that have focused on localization often find that bacterial  
83 communities within coral cell layers (i.e. epidermal and gastrodermal layers) form  
84 aggregations termed coral-associated microbial aggregates (CAMAs) <sup>30,31</sup>. CAMAs  
85 were first reported as potential pathogens when observed within healthy tissues of  
86 Caribbean corals displaying signs of white band disease <sup>32,33</sup>. Further studies  
87 subsequently reported that CAMAs are widespread in tissues of healthy corals sampled  
88 from geographically dispersed areas <sup>31,33,34</sup>. To date, CAMAs have been reported from 5  
89 species of corals in the Caribbean <sup>32,33</sup> and 24 species from the Indo-Pacific <sup>31</sup>, although  
90 their frequency varies among coral genera, with the genera *Acropora*, *Porites*, and  
91 *Pocillopora* most commonly hosting bacterial aggregates <sup>31</sup>. Identification of the



92 microorganisms that constitute these CAMAs has been poorly resolved. Neave et al.  
93 (2016) visualized aggregates (i.e., “cyst-like aggregations”) of *Endozoicomonas* within  
94 tissues of *Stylophora pistillata* at the interface of the epidermis and gastrodermis in  
95 samples taken from widely-separated biogeographic regions<sup>35</sup>. However, the fine-scale  
96 spatial distributions of microorganisms and potential microhabitat-associated structure  
97 of the microbiome still have not been clarified. Here, we visualize the localization,  
98 distribution and morphology of CAMAs associated with the coral *Acropora hyacinthus*  
99 sampled from Sesoko Island, Okinawa, Japan and sites in the northern Great Barrier  
100 Reef (GBR) Australia located along an inshore to offshore gradient.

101

## 102 **Results**

### 103 *Comparison of CAMA abundance among geographic locations*

104 At the time of field collection, all 48 colonies of *A. hyacinthus* sampled from  
105 the 5 geographic locations (see **Fig. 1**) appeared visually healthy. This was confirmed  
106 by subsequent histological analyses, which found that all tissues displayed normal cell  
107 morphology, including no signs of fragmentation, wound repair or necrosis (as per  
108 criteria in Work and Aeby 2011). In total, 318 CAMAs were characterized via histology  
109 within coral tissues from the 48 samples. The vast majority stained basophilic (95.9%)  
110 using the standard haematoxylin and eosin stain, compared to only 4.1 % staining  
111 eosinophilic (**Fig. 2**). Of the 48 colonies collected across all five sites, CAMAs were  
112 detected in 27 of the colonies (~56%). At one site (Sesoko Island), tissues from all 10  
113 colonies sampled contained CAMAs (**Fig. 2c**), whereas at the other four sites, CAMAs

114 were observed only in some of the coral tissues sampled. For example, clear CAMAs  
115 were visible in 80% of Inner Shelf samples, 30% of Lizard Island, 25% of Outer Shelf,  
116 and 40% of Orpheus Island samples (n=10 samples at all sites, except at the Outer Shelf  
117 site where n=8 samples) (**Fig. 2c**). In general, the abundance of CAMAs was  
118 significantly higher at the inshore Sesoko Island site than at more offshore sites (Lizard  
119 Island, Outer Shelf, and Orpheus Island sites;  $p < 0.05$ ).

120           The density of basophilic CAMAs in tissues was significantly higher for the  
121 Sesoko Island and Inner Shelf sites compared to the other three sites, with  $20.13 \pm 17.1$   
122 and  $5.43 \pm 8.7$  basophilic CAMAs detected per  $\text{cm}^2$  of tissue at these two sites,  
123 respectively (**Fig. 2d**;  $p < 0.05$ ). In one sample from Sesoko Island, 48.9 CAMAs were  
124 detected per  $\text{cm}^2$  of tissue, the greatest density of CAMAs observed in the 48 samples  
125 investigated. This is in contrast to an average of  $0.28 \pm 0.4$ , 0 and  $1.1 \pm 2.3$  CAMAs per  
126  $\text{cm}^2$  for the Lizard Island, Outer Shelf and Orpheus Island samples, respectively (**Fig.**  
127 **2d**). In contrast, the abundance of eosinophilic CAMAs did not differ significantly  
128 among the five sites, although the density of CAMAs was higher at the Outer Shelf,  
129 GBR site ( $1.3 \pm 3.5$  CAMAs per  $\text{cm}^2$ , **Fig. 2d**) than at other sites (Sesoko Island: 0  
130 CAMAs per  $\text{cm}^2$ ; Inner Shelf, GBR:  $0.1 \pm 0.3$  CAMAs per  $\text{cm}^2$ , Lizard Island, GBR: 0  
131 CAMAs per  $\text{cm}^2$ ; Orpheus Island, GBR  $0.2 \pm 0.7$  CAMAs per  $\text{cm}^2$ ).

132

### 133 *Distribution of CAMAs within anatomical regions of the coral polyp*

134           Specific detection of bacteria by fluorescent *in situ* hybridization (FISH) can  
135 be problematic for coral samples due to nonspecific binding of probes and background

136 autofluorescence of granular cells and nematocysts<sup>37</sup>. Therefore, CAMAs were  
137 identified by their characteristic shapes, in addition to fluorescent signals derived from  
138 binding to the general bacteria-targeted probe set EUB338mix and comparisons to  
139 background autofluorescence and non-specific binding (using Non338 probe). A total of  
140 307 CAMAs were identified and localized by FISH (170 in Sesoko Island samples, 126  
141 in samples from Inner Shelf sites in the Northern GBR, 4 from Lizard Island, 2 from  
142 Outer Shelf sites in the Northern GBR, and 5 from Orpheus Island samples). CAMAs  
143 were found within six anatomical regions of the coral polyp: the tentacle,  
144 actinopharynx, mesentery, mesenterial filament, coenosarc and calicoblastic layer (see  
145 **Fig. 3a**). Thirty-one additional CAMA-like shaped structures were observed (from three  
146 samples derived from Sesoko Island), but these were discounted as bacterial aggregates  
147 due to non-probe binding signals and excluded from further downstream analysis. The  
148 CAMAs appeared to be randomly distributed across the anatomical regions  
149 investigated, although because the numbers of CAMAs characterized for the Lizard  
150 Island, Outer Shelf and Orpheus Island samples were low (**Fig. 3b**), meaningful  
151 comparisons can only be made between the Sesoko Island and Northern Inner Shelf  
152 samples. For the Sesoko Island samples, CAMAs were found predominantly in the  
153 tentacles (36.5%), mesenterial filaments (34.7%) and coenosarc (16.5%) regions; in  
154 Inner Shelf samples from Northern GBR sites, CAMAs were mostly located in the  
155 calicoblastic layer (46.8%), tentacles (17.5%) and coenosarc (16.7%) (**Fig. 3b**).

156 CAMAs spanned a wide size range, from 23 to 6,761  $\mu\text{m}^2$  across tissue  
157 samples from all sites (**Fig. 3c**). In general, measurements underestimated the size of

158 CAMAs, given that measurements were dependent on the orientation of sectioning and  
159 it is unlikely that most CAMAs were sectioned through their greatest diameter.  
160 Acknowledging constraints associated with sectioning, the average size of CAMA's  
161 was  $1,304 \mu\text{m}^2$ . On average, Sesoko Island samples contained larger aggregates  
162 ( $1,507.7 \pm 1,522.4 \mu\text{m}^2$ ) than samples from the GBR region (Inner Shelf:  $637.4 \pm 734$   
163  $\mu\text{m}^2$ ). However, given the large range in sizes measured, the fact that only two locations  
164 had sufficient sample sizes for comparison, and the issue of sectioning orientation  
165 potentially biasing size measurements, such patterns require further validation. No  
166 patterns in the size of CAMAs across different anatomical regions were detected (**Fig.**  
167 **3c**).

168

#### 169 *Morphology of CAMAs within coral tissues*

170 High resolution imaging was used to partially characterize and compare the  
171 morphology of bacteria across the CAMAs detected (**Fig. 4**). Interestingly, each CAMA  
172 appeared to be composed of a single morphological type of bacteria, although  
173 morphological types varied among CAMAs. Overall, five different morphological types  
174 of bacteria were identified: rod-shaped (length  $2.5 \pm 0.1 \mu\text{m}$ , width  $0.6 \pm 0.0 \mu\text{m}$ , **Fig. 4a**,  
175 **e**), an atypical cocci (length  $4.8 \pm 0.3 \mu\text{m}$ , width  $3.1 \pm 0.2 \mu\text{m}$ , **Fig. 4b, f**), a longer rod  
176 morphology (length  $8.0 \pm 0.0 \mu\text{m}$ , width  $0.8 \pm 0.0 \mu\text{m}$ , **Fig. 4c, g**), filamentous-like  
177 bacteria (length N.D., width  $0.4 \pm 0.0 \mu\text{m}$ , **Fig. 4d, h**), and a rod-shaped morphology but  
178 with spore-like structures (**Fig. 4i-j, m-n**). While the consistency of morphological  
179 characteristics within each CAMA may indicate that CAMAs are hosting single

180 bacterial types, it is also possible that they host multiple bacterial species with similar  
181 morphologies. Interestingly, the fluorescent signal detected for some CAMAs was not  
182 uniform over the entire aggregation. The lack of signal within some CAMAs (see **Fig.**  
183 **4d** for example) may be due to the probe not targeting microbial cells that inhabit that  
184 space. Defining a specific morphological shape for the bacterial cells observed was  
185 sometimes difficult, with patchy probe hybridization producing images of structures that  
186 potentially protruded from the tissue sections and seemed amorphous (**Fig. 4k-l, o-p**).  
187 However, this again could be the result of mixed microbial communities within the  
188 CAMA's, with some cells targeted by the probes, but others not hybridizing to the  
189 probe-fluorochrome conjugate.

190 Further three-dimensional reconstructions of z-stacked FISH images of select  
191 100  $\mu\text{m}$  stained sections of tentacles visualized the CAMAs as typically spheroid or  
192 ellipsoid-shaped structures (**Fig. 5a**). In one example, a single CAMA was located  
193 independently in the ectoderm of a tentacle (**Fig. 5b**). In a different tentacle, multiple  
194 smaller CAMAs were localized close to *Symbiodiniaceae* cells in the gastrodermal  
195 region (**Fig. 5c**). Sizes of the large single CAMA and the multiple smaller CAMAs were  
196  $33,400 \mu\text{m}^3$  (**Fig. 5d**, surface area  $7,729 \mu\text{m}^2$ ) and  $1,978 \pm 141.2 \mu\text{m}^3$  (**Fig. 5e**,  $809.5 \pm$   
197  $59.9 \mu\text{m}^2$ ,  $n=4$  CAMAs), respectively. Even though the CAMAs were located in the  
198 same polyp, the size of the single large CAMA was approximately 40-fold greater than  
199 the multiple smaller CAMAs, demonstrating inherent size variability for these  
200 structures. The bacteria within these CAMAs displayed a similar rod-shaped  
201 morphology (see **Fig. 4a and e**), with the average cross-sectional area of each bacterium

202 being  $175.7 \mu\text{m}^2$  and  $22.6 \pm 4.2 \mu\text{m}^2$ , respectively (**Suppl. Fig. 2**). Based on cell size, the  
203 number of individual rod-shaped bacterial cells within the 3D rendered images of these  
204 CAMAs was estimated as  $\sim 47,275$  cells for the large single CAMA located in the  
205 ectoderm of the tentacle (**Fig. 5d** and **Suppl. Fig. 2a**), and  $2,799 \pm 200$  cells (**Fig. 5e** and  
206 **Suppl. Fig. 2b**) for each of the smaller CAMAs localized close to *Symbiodiniaceae*  
207 cells.

208

## 209 **Discussion**

210           The importance of microbial symbionts to their hosts has been demonstrated  
211 for many animals, through acquisition and passage of nutrients, niche space occupation  
212 and shared metabolic pathways<sup>38-40</sup>. For corals, the fundamental roles that  
213 endosymbiotic dinoflagellates (*Symbiodinium* spp.) play in fitness of the coral holobiont  
214 have long been established<sup>e.g., 41,42</sup>, but although many studies have postulated the  
215 importance of bacterial communities to coral fitness (see in the review)<sup>3</sup>, direct  
216 evidence is still mostly lacking<sup>15</sup>. To facilitate a more comprehensive understanding of  
217 the roles bacterial communities may play in the coral holobiont, an improved  
218 understanding of the localization of these microbial communities is essential,  
219 particularly tissue-associated bacterial communities housed within structures termed  
220 coral-associated microbial aggregates (CAMAs). In this study, we provide high  
221 resolution characterization of these aggregations in tissues of *A. hyacinthus* sampled  
222 from sites in Japan and the Great Barrier Reef, Australia, including estimates of CAMA

223 distributions, density and size, as well as visualization of the morphologies of bacterial  
224 cells within these structures.

225           We found that CAMAs commonly occur in healthy tissues of the coral  
226 *Acropora hyacinthus* collected from sites in Japan and Australia separated by more than  
227 40 degrees of latitude. Although CAMAs were not detected in all tissue samples  
228 collected, this may reflect limitations in the area of coral tissue that can be surveyed via  
229 histological approaches. The presence of CAMAs in a histological section will depend  
230 on the tissue sectioned (i.e. the location of the fragment on the colony and on the section  
231 from the fragment), and on the scale and orientation of the section. Therefore, although  
232 not all coral tissue samples (and therefore not all colonies) were found to host CAMAs,  
233 we cannot exclude the possibility that other tissue areas of the same colony had CAMAs  
234 present. Other studies have also reported that CAMAs are common in tissues of many  
235 coral species in the Caribbean <sup>32,33</sup>, Indo-Pacific and Red Sea <sup>31,34,35</sup>. In particular,  
236 CAMAs were common in species of *Acropora*, *Porites*, and *Pocillopora*, although often  
237 their presence was patchy within a population sample <sup>31</sup>.

238           Interestingly, CAMAs were detected in a higher proportion of samples from  
239 inshore sites (i.e., 100% of Sesoko Island samples, 80% of samples from the northern  
240 GBR Inner Shelf site) than from offshore sites (25-40% of samples). Tissue density of  
241 CAMAs was also greatest in inshore samples (20.1±17.1 and 5.4±8.7 CAMAs per cm<sup>2</sup>  
242 for Sesoko Island and Inner Shelf GBR samples, respectively), and densities  
243 progressively decreased in tissues from the three more offshore sites (<1.2 CAMAs per  
244 cm<sup>2</sup>), culminating in 0 CAMAs per cm<sup>2</sup> in the northern GBR Outer Shelf samples.

245 Although our study provides only a snapshot of five sites sampled at one time point, it  
246 suggests that inshore reef environments may promote the development of CAMAs  
247 within coral tissues. The inshore site at Sesoko Island has high nutrient influxes,  
248 especially phosphates<sup>43,44</sup>. Similarly, nearshore GBR sites are influenced by influxes of  
249 dissolved nutrients from terrestrial runoff, with higher concentrations typically found at  
250 inshore compared with offshore sites<sup>45</sup>. Temperature fluctuations may also influence  
251 CAMA abundance, although differences in seasonal temperature fluctuations are  
252 minimal across the northern GBR sites<sup>46</sup>. The coral microbiome community has been  
253 shown to shift in response to environmental stressors<sup>29,47-52</sup>, thus water quality  
254 parameters influencing microbiological composition and function<sup>53</sup> could stimulate  
255 CAMA abundance. Further studies, particularly of potential links between nutrient  
256 levels and CAMA development, are needed to understand what might drive the  
257 increased prevalence and density of CAMAs in coral tissues at inshore sites, and to  
258 determine if hosting more CAMAs is beneficial to corals or is an indicator of negative  
259 impacts on the coral holobiont.

260           Localization of CAMAs using FISH demonstrated that they occur in all six  
261 of the anatomical regions investigated, i.e., the tentacle, actinopharynx, mesentery,  
262 mesenterial filament, coenosarc and the calicoblastic layer. CAMAs were highly  
263 variable in size, spanning a range from 23 to 6,761  $\mu\text{m}^2$  in area, with no obvious pattern  
264 in size when analyzed by anatomical region or geographic site. Although Sesoko Island  
265 samples contained larger aggregates on average (average cross-sectional area of  
266  $1,507.7 \pm 1,522.4 \mu\text{m}^2$ ) than other sampling sites, low numbers of CAMAs in tissues



267 from some sites, combined with potential bias introduced by sectioning, limit the  
268 conclusions that can be drawn. Nevertheless, investigation of the potential influence of  
269 water quality parameters on the size of CAMAs is warranted.

270           Estimating the number of cells within CAMAs using 3D imaging revealed  
271 that a CAMA with a cross-sectional area of  $22.6 \pm 4.2 \mu\text{m}^2$  would be composed of  
272  $\sim 2,800$  rod-shaped bacteria. Based on similar methods, we further extrapolated that  
273 bacterial densities in tissues from Sesoko Island and Inner Shelf GBR corals are  
274 approximately  $5.6 \times 10^4$  and  $1.5 \times 10^4$  cells per  $\text{cm}^2$  (along a linear cross-section),  
275 respectively. Very few studies have accurately determined bacterial cell densities  
276 associated with corals. Counts for bacteria in the coral mucus layer can be as high as  $10^7$   
277 cells  $\text{ml}^{-1}$  <sup>54</sup>. Estimates of bacteria on tissue surfaces range from  $1 \times 10^5$  to  $10^6$  cells per  
278  $\text{cm}^2$  for the coral *Pocillopora damicornis* <sup>55</sup> and  $8.3 \times 10^6$  to  $6.2 \times 10^7$  cells per  $\text{cm}^2$  for  
279 the coral *Oculina patagonica* <sup>24</sup>. However, these counts are based on bacteria external to  
280 coral tissues and therefore not directly comparable to estimates from our 3D  
281 reconstructions of CAMAs visualized within coral tissues. Our results highlight that  
282 tissue-associated communities exist and that differentiating these communities from  
283 external and mucus-associated microbial communities is important for accurate  
284 appraisals of the coral microbiome and for identifying their role(s) within the coral  
285 holobiont.

286           An important finding from our high-resolution FISH imaging study is that in  
287 most cases, each CAMA contained bacterial cells that were consistent in their  
288 morphological appearance. Moreover, bacterial morphologies varied among CAMAs,

289 with up to five different cell morphologies detected. This variation in bacterial cell  
290 morphology among CAMAs may explain why the histological staining properties of  
291 CAMAs varied, the majority being basophilic (95.9%), but 4.1% staining eosinophilic  
292 (n=318 CAMAs detected in total). Similar variability in the staining of CAMAs has  
293 been reported previously<sup>31,56</sup>, and has been attributed to varying degrees of protein and  
294 DNA production or local tissue pH conditions<sup>31</sup>. However, our finding that different  
295 morphological variants of bacteria are housed within different CAMA's potentially  
296 contributes to variation in the H&E staining observed. Previous studies have reported  
297 that the abundant coral-associated bacterial genera *Endozoicomonas* forms aggregates  
298 within tissues of the corals *Stylophora pistillata* and *Pocillopora verrucosa*<sup>35,57</sup>. Indeed,  
299 extensive sequence-based phylogenetic surveys of coral microbiomes have revealed that  
300 several dominant bacterial groups are common<sup>20</sup>, including the *Proteobacteria*  
301 (particularly *Alpha*- and *Gamma*-*proteobacteria* inclusive of *Endozoicomonas*), as well  
302 as *Actinobacteria*, *Bacteroidetes* (especially *Flavobacteria*), and *Cyanobacteria*<sup>3</sup>.  
303 Hence some of the different cellular morphologies we detected within CAMAs may  
304 represent common coral-associated bacterial groups profiled in microbiome diversity  
305 studies. In addition, two dominant bacteria were found to be localized intercellularly  
306 within *Symbiodiniaceae* residing in the gastrodermal layers of coral host tissues using  
307 both sequencing and FISH<sup>27</sup>. We note, however, that bacterial morphology can be  
308 plastic and dependent on numerous variables, such as division stage, colonization,  
309 chemical environment, physical constraints and nutrient availability<sup>58</sup>. Future work  
310 targeting CAMAs with taxa-specific probes and gene sequencing approaches would

311 help to resolve both the taxonomy and potential functional roles of bacterial types  
312 within the holobiont.

313 FISH imaging showed that, for some of the CAMAs, patchy probe-specific  
314 labeling occurred, resulting in dull or dark areas within the structures. There are a  
315 number of potential methodological reasons for this observation, including: 1)  
316 insufficient probe sensitivity due to low ribosomal rRNA content in target cells <sup>59,60</sup>, 2)  
317 methodological and environmental factors that prevent probes from accessing target  
318 cellular rRNA at these sites <sup>61</sup>, 3) the bacterial community penetrating and proliferating  
319 within the outer epidermal layer of coral tissues <sup>34</sup>, or 4) lipid or fat solvents deposited  
320 through dehydration and dewaxing steps showing empty spaces in the tissues <sup>62</sup>.

321 Alternatively, little to no signal in central regions of some of the CAMAs could indicate  
322 that the probe EUB338mix did not target the taxonomic group of microbes within these  
323 regions. The EUB338mix is estimated to cover 96% of the *Eubacteria* domain, but taxa  
324 outside this coverage, including archaeal lineages, may be present <sup>63</sup>. We speculate that  
325 some of the CAMAs may be mixed communities containing bacteria not targeted by the  
326 probes or even *Archaea*, which have been identified to associate with corals in  
327 microbiome diversity studies <sup>64</sup>. A recent coral metagenomic study recovered  
328 *Thermarchaeota* genome bins from a *Porites sp* that was potentially metabolically  
329 linked through nitrogen cycling to other coral microbial-associated taxa, including  
330 *Nitrospira* <sup>5</sup>. Co-aggregation of ammonia-oxidizing archaea with nitrite-oxidizing  
331 bacteria is common in other organisms, such as sponges <sup>65,66</sup>. Findings that CAMAs are  
332 often co-localized near *Symbiodiniaceae* cells highlights the need for further isotope

333 studies to visualize and validate potential metabolic integrated links between bacterial,  
334 archaeal and *Symbiodiniaceae* symbionts.

335

## 336 **Conclusion**

337           Localization of microorganisms associated with corals is vital to understand  
338 their symbiotic relationships and reveal their function(s) within the holobiont. Here we  
339 provide novel insight into the distributions and densities of bacteria within tissues of the  
340 coral *Acropora hyacinthus* sampled from five different locations. CAMAs were  
341 common in coral tissues sampled, although their abundance differed across geographic  
342 sites. While each CAMA appeared to be dominated by a single bacterial morphological  
343 type, different CAMA hosted different bacterial morphotypes. CAMAs have been  
344 defined as facultative symbionts, not necessary for host fitness<sup>31</sup>, however their high  
345 prevalence and abundance in coral tissues may indicate they are integrated into shared  
346 metabolic pathways and central to maintaining coral fitness through provisioning  
347 benefits. Such propositions require testing by tracing metabolic pathways, as well as  
348 improved taxonomic and functional assessment of the microorganisms housed within  
349 these CAMAs.

350

## 351 **Materials and methods (less than 1500 words)**

352           Fragments (~ 3 cm x 3 cm; n=48 colonies) of the tabulate coral *Acropora*  
353 *hyacinthus* (Dana, 1846) were collected from five geographic locations across two  
354 countries (Australia and Japan). Samples from Japan (n=10) were collected from

355 Sesoko Island (26°37'40.3"N, 127°51'36.4"E, depth 1.5–3.0 m, colony size 62.8±41.7  
356 cm) in Okinawa, Japan in July 2015. On the Great Barrier Reef (GBR) Australia,  
357 samples were collected from the Northern sector along an inshore to offshore gradient  
358 inclusive of Lizard Island (see Fig. 1; n=10 from an Inner Shelf site (14°47'29.4"S,  
359 145°20'18.8"E, depth 3–5 m, colony size 77.69±43.0 cm), n=10 from Lizard Island  
360 (14°68'60.40"S, 145°44'49.56"E, depth 2–4 m, colony size 61.67±17.5 cm) and n=8  
361 from an Outer Shelf site (14°38'30.0"S, 145°38'22.5"E, depth 2–5 m, 41±20.5 cm)) in  
362 February 2012. Samples (n =10) were also collected from reefs around Orpheus Island  
363 (18°35'55.4"S, 146°29'33.8"E, depth 2–3 m, colony size N.D.) in the inner central  
364 region of the Great Barrier Reef in March 2012.

365           Following collection, samples were immediately rinsed with sterile seawater  
366 and then fixed in 4% paraformaldehyde (Electron Microscopy, USA and Wako, Japan)  
367 in 10mM phosphate buffered saline (PBS; pH 7.4) for 8–10 hours maintained at 4 °C.  
368 Samples were subsequently rinsed twice with 70% ethanol and stored in 70% ethanol at  
369 4 °C prior to decalcification. After samples were rinsed by PBS twice for 30 min each,  
370 samples were decalcified at 4 °C in a 10% EDTA (sigma-Aldrich, USA) solution (w/v;  
371 pH 8.0 adjusted by sodium hydroxide [Wako, Japan]), which was exchanged  
372 approximately every two days until no coral skeleton remained. The decalcified samples  
373 were rinsed in PBS, and dehydrated sequentially through 70%, 90%, abs. 100% and abs.  
374 100% ethanol series (60 min each), then processed through a 1:1 solution of abs. 100%  
375 ethanol and toluene and two toluene (30 min each), and embedded in paraffin. Nine  
376 sections (three serial sections x three sets; interval = 100 µm between each set) of each

377 coral fragment, each 4  $\mu\text{m}$  thick, were cut from each paraffin-embedded sample (Suppl.  
378 Fig. 3). In addition, thicker 100  $\mu\text{m}$  sections were cut from coral tissues to allow  
379 reconstructions of three-dimensional configurations of the CAMAs (see below). Serial  
380 sections were mounted on one slide coated with egg-white glycerin and on two slides  
381 with poly-L-lysine solution (Sigma-Aldrich, USA) for HE staining and fluorescence *in*  
382 *situ* hybridization (FISH), respectively. We analyzed a total 144 sets (432 sections) of  
383 the serial sections for H&E staining and FISH among five location sites.

384           For HE staining, one serial section from each set was dewaxed in xylene (2 x  
385 15 min), rehydrated through ethanol series with abs. 100%, 99%, 90% and 70% (5 min  
386 each) and rehydrated completely in sterile water. Hydrated sections were stained in  
387 Mayer's hematoxylin (Wako, Japan) for 10 min, rinsed in water for 5 min, then stained  
388 with eosin Y (Merck, Germany) for 5 min, and further rinsed in water for 30 sec. The  
389 stained sections were dehydrated through the same ethanol series in reverse with  
390 agitation (few sec each), cleared by xylene (2 x 5 min) and finally mounted in Entellan  
391 mounting medium (Merck, Germany). HE stained sections were observed and recorded  
392 using an ECLIPSE Ni microscope (Nikon, Japan) and BIOREVO BZ-9000 microscope  
393 (KEYENCE, Japan).

394           The other two serial sections from each set were subjected to FISH according  
395 to the protocol detailed in Wada et al. (2016)<sup>37</sup>. Briefly, sections were dewaxed in  
396 xylene (2 x 15 min), dehydrated briefly once in 100% ethanol and dried completely.  
397 The dried sections were immersed in a 0.2 M HCl solution for 12 min, followed by a 20  
398 mM Tris-HCl solution (pH 8.0) for 10 min at room temperature. The sections were

399 mounted with proteinase K ( $50 \mu\text{g ml}^{-1}$ ) in 20 mM Tris-HCl solution at  $37^\circ\text{C}$  for 5 min  
400 for bacterial cell wall permeabilization, and washed in a 20 mM Tris-HCl solution at  
401 room temperature for 10 min. Oligonucleotide probes, including a probe targeting the  
402 16S rRNA gene (EUB338mix: 5'-GCWGCCWCCCGTAGGWGT-3') and a nonsense,  
403 negative control probe (Non338: 5'- ACATCCTACGGGAGGC -3'), were labeled with  
404 the Cy3 fluochrome (eurofins, USA) <sup>67,68</sup>. Tissue sections were covered with  
405 hybridization buffer (30% v/v formamide, 0.9 M NaCl, 20 mM Tris-HCl [pH 8.0],  
406 0.01% SDS), then each oligonucleotide probe was added to a final concentration of 25  
407  $\text{ng } \mu\text{l}^{-1}$  to each serial section. The slides were incubated at  $46^\circ\text{C}$  for 1.5 hour. After  
408 incubation, sections were washed in 50 ml falcon tubes containing preheated wash  
409 buffer (0.112 M NaCl, 20 mM Tris HCl [pH 8.0], 0.01% SDS, 5 mM EDTA [pH 8.0])  
410 in a water bath at  $48^\circ\text{C}$  for 10 min, then soaked immediately with agitation in cold  
411 water, and air dried completely. The dried sections were mounted in an antifade  
412 mounting medium Fluoromount/Plus (Diagnostic BioSystems, USA). Sections were  
413 examined and recorded using a FV1000-D confocal microscope (Olympus, Japan) with  
414 two channels, using the following settings: (1) laser: 405 nm and 559 nm; (2) excitation  
415 dichroic mirror: DM405/473/559; (3) emission dichroic mirror: SDM560 and mirror;  
416 (4) band-pass filter: None and BA575–620 for detecting autofluorescence of coral tissue  
417 (blue) and Cy3 signal (red), respectively. Non-specific probe binding in tissue sections  
418 was identified as detailed by Wada et al. (2016)<sup>37</sup>.

419           Three-dimensional images (3D) of CAMAs were reconstructed from the thick  
420 sections ( $100 \mu\text{m}$ ) which were cut carefully from two samples (S6 from the Sesoko

421 Island and LO8 from the Outer Shelf GBR site). Sections were visualized via FISH  
422 according to methods described above, and examined using a LSM 880 (ZIESS,  
423 Germany) with two tracks and the following settings: (1) laser: 405 nm and 561 nm; (2)  
424 beam splitter: MBS -405 and MBS 488/561; (3) filter: 371–479 nm for auto-  
425 fluorescence of coral tissue (blue) and 627–758 nm for *Symbiodiniaceae* (green) in  
426 track 1 and 565–588 nm for Cy3 signals (red) in track 2, respectively. For  
427 reconstructing the 3D images, the sections consisted of z-stack images at 3.0  $\mu\text{m}$   
428 intervals for 10x and 0.7  $\mu\text{m}$  each and 40x magnifications using the Z-stack function in  
429 LSM 880. The z-stack images were processed and reconstructed with surface rendering of  
430 the Cy3 signals in Imaris software ver. 8.0.2 (BitplaneAG, USA).

431 Statistical analysis was conducted using R Stats ver. 3.5.1 <sup>69</sup> with the  
432 following packages: DescTools ver. 0.99.26 <sup>70</sup>, dplyr ver. 0.7.6 <sup>71</sup>, FSA ver. 0.8.20 <sup>72</sup>,  
433 lattice ver. 0.20–36 <sup>73</sup>, and rcompanion ver. 2.0.0 <sup>74</sup>. To compare the abundances of  
434 CAMAs at the colony level among sites, G-tests followed by post hoc Bonferroni  
435 corrections were used. To evaluate the density of CAMAs within coral tissues, we  
436 compared the distribution of CAMAs among five sites using the Kruskal-Wallis test  
437 with Dunn's multiple comparison followed by a Benjamini-Hochberg correction  
438 method.

439

#### 440 **Author contribution**

441 NW, NM and DB conceived the study. NW, JP and DB designed the sampling and  
442 FISH experiments. NW and JP conducted the field sampling. NW, MI and TM



443 performed the histological work and all observations and data collection. NW and DB  
444 had major contribution in the manuscript writing and the figure making. JP, ST, TA,  
445 BW and NM contributed to writing and editing the manuscript. All authors critically  
446 reviewed, revised and ultimately approved this final version.

447

#### 448 **Acknowledgements**

449 Dr. Joleah Lamb (Cornell University), Mr. Sefano Katz (Pacific Blue Foundation), Dr.  
450 Gergely Torda (ARC Center of Excellence for Coral Reef Studies, James Cook  
451 University), and Dr. Melanie Trapon (CSIRO) are thanked for helping to collect  
452 samples. We are also grateful to Mr. Yasuhiko Sato from Zieiss Microscopy Japan, and  
453 Mr. Ji-Ying Huang and IPMB Live-Cell-Imaging Core Lab in the Institute Academia  
454 Sinica for supporting the microscopy and Imaris software used, respectively.

455

#### 456 **References**

- 457 1. Rohwer, F., Seguritan, V., Azam, F. & Knowlton, N. Diversity and distribution of  
458 coral-associated bacteria. *Mar. Ecol. Prog. Ser.* **243**, 1–10 (2002).
- 459 2. Rosenberg, E., Koren, O., Reshef, L., Efrony, R. & Zilber-Rosenberg, I. The role of  
460 microorganisms in coral health, disease and evolution. *Nat. Rev. Microbiol.* **5**, 355–  
461 62 (2007).
- 462 3. Bourne, D. G., Morrow, K. M. & Webster, N. S. Insights into the Coral Microbiome:  
463 Underpinning the Health and Resilience of Reef Ecosystems. *Annu. Rev. Microbiol.*  
464 **70**, 317–340 (2016).
- 465 4. Yuyama, I., Ishikawa, M., Nozawa, M., Yoshida, M. & Ikeo, K. Transcriptomic  
466 changes with increasing algal symbiont reveal the detailed process underlying  
467 establishment of coral-algal symbiosis. *Sci. Rep.* **8**, 16802 (2018).

- 468 5. Robbins, S. J. *et al.* A genomic view of the coral holobiont. *Nat. Microbiol.* (in  
469 press).
- 470 6. Lema, K. A., Willis, B. L. & Bourne, D. G. Corals Form Characteristic Associations  
471 with Symbiotic Nitrogen-Fixing Bacteria. *Appl. Environ. Microbiol.* **78**, 3136–3144  
472 (2012).
- 473 7. Pogoreutz, C. *et al.* Nitrogen Fixation Aligns with *nifH* Abundance and Expression  
474 in Two Coral Trophic Functional Groups. *Front. Microbiol.* **8**, (2017).
- 475 8. Yang, S.-H. *et al.* Metagenomic, phylogenetic, and functional characterization of  
476 predominant endolithic green sulfur bacteria in the coral *Isopora palifera*.  
477 *Microbiome* **7**, 3 (2019).
- 478 9. Raina, J.-B. *et al.* DMSP biosynthesis by an animal and its role in coral thermal  
479 stress response. *Nature* **502**, 677–680 (2013).
- 480 10. Raina, J.-B. *et al.* Isolation of an antimicrobial compound produced by  
481 bacteria associated with reef-building corals. *PeerJ* **4**, e2275 (2016).
- 482 11. Gochfeld, D. J. & Aeby, G. S. Antibacterial chemical defenses in Hawaiian  
483 corals provide possible protection from disease. *Mar. Ecol. Prog. Ser.* **362**, 119–128  
484 (2008).
- 485 12. Ritchie, K. B. Regulation of microbial populations by coral surface mucus  
486 and mucus-associated bacteria. *Mar. Ecol. Prog. Ser.* **322**, 1–14 (2006).
- 487 13. Shnit-Orland, M. & Kushmaro, A. Coral mucus-associated bacteria: a  
488 possible first line of defense. *FEMS Microbiol. Ecol.* **67**, 371–380 (2009).
- 489 14. Galloway, S. B. *et al.* *Coral Disease and Health Workshop: Coral*  
490 *Histopathology II*. (NOAA Technical Memorandum NOS NCCOS 56 and NOAA  
491 Technical Memorandum CRCP 4, National Oceanic and Atmospheric  
492 Administration, Silver spring, 2007).
- 493 15. Peixoto, R. S., Rosado, P. M., Leite, D. C. de A., Rosado, A. S. & Bourne, D.  
494 G. Beneficial Microorganisms for Corals (BMC): Proposed Mechanisms for Coral  
495 Health and Resilience. *Front. Microbiol.* **8**, (2017).
- 496 16. Yang, S.-H. *et al.* Long-Term Survey Is Necessary to Reveal Various Shifts  
497 of Microbial Composition in Corals. *Front. Microbiol.* **8**, (2017).
- 498 17. Prazeres, M., Ainsworth, T., Roberts, T. E., Pandolfi, J. M. & Leggat, W.  
499 Symbiosis and microbiome flexibility in calcifying benthic foraminifera of the Great  
500 Barrier Reef. *Microbiome* **5**, 38 (2017).

- 501 18. Shiu, J.-H. *et al.* A Newly Designed Primer Revealed High Phylogenetic  
502 Diversity of Endozoicomonas in Coral Reefs. *Microbes Environ.* **33**, 172–185  
503 (2018).
- 504 19. Hernandez-Agreda, A., Leggat, W., Bongaerts, P., Herrera, C. & Ainsworth,  
505 T. D. Rethinking the Coral Microbiome: Simplicity Exists within a Diverse  
506 Microbial Biosphere. *mBio* **9**, e00812-18 (2018).
- 507 20. Pollock, F. J. *et al.* Coral-associated bacteria demonstrate phylosymbiosis and  
508 cophylogeny. *Nat. Commun.* **9**, 4921 (2018).
- 509 21. Knowlton, N. & Rohwer, F. Multispecies Microbial Mutualisms on Coral  
510 Reefs: The Host as a Habitat. *Am. Nat.* **162**, S51–S62 (2003).
- 511 22. Ritchie, K. B. & Smith, G. W. Microbial Communities of Coral Surface  
512 Mucopolysaccharide Layers. in *Coral Health and Disease* (eds. Rosenberg, P. E. &  
513 Loya, P. Y.) 259–264 (Springer Berlin Heidelberg, 2004).
- 514 23. Bourne, D. G. & Munn, C. B. Diversity of bacteria associated with the coral  
515 Pocillopora damicornis from the Great Barrier Reef. *Environ. Microbiol.* **7**, 1162–  
516 1174 (2005).
- 517 24. Koren, O. & Rosenberg, E. Bacteria Associated with Mucus and Tissues of  
518 the Coral *Oculina patagonica* in Summer and Winter. *Appl. Environ. Microbiol.* **72**,  
519 5254–5259 (2006).
- 520 25. Johnston, I. S. & Rohwer, F. Microbial landscapes on the outer tissue surfaces  
521 of the reef-building coral *Porites compressa*. *Coral Reefs* **26**, 375–383 (2007).
- 522 26. Chiu, H.-H., Mette, A., Shiu, J.-H. & Tang, S.-L. Bacterial Distribution in the  
523 Epidermis and Mucus of the Coral *Euphyllia glabrescens* by CARD-FISH. *Zool.*  
524 *Stud.* **11** (2012).
- 525 27. Ainsworth, T. D. *et al.* The coral core microbiome identifies rare bacterial  
526 taxa as ubiquitous endosymbionts. *ISME J.* **9**, 2261–2274 (2015).
- 527 28. Yang, S.-H. *et al.* Prevalence of potential nitrogen-fixing, green sulfur  
528 bacteria in the skeleton of reef-building coral *Isopora palifera*. *Limnol. Oceanogr.* **61**,  
529 1078–1086 (2016).
- 530 29. Glasl, B., Herndl, G. J. & Frade, P. R. The microbiome of coral surface  
531 mucus has a key role in mediating holobiont health and survival upon disturbance.  
532 *ISME J.* **10**, 2280–2292 (2016).

- 533 30. Ainsworth, T. D., Fine, M., Roff, G. & Hoegh-Guldberg, O. Bacteria are not  
534 the primary cause of bleaching in the Mediterranean coral *Oculina patagonica*. *ISME*  
535 *J.* **2**, 67–73 (2007).
- 536 31. Work, T. & Aeby, G. Microbial aggregates within tissues infect a diversity of  
537 corals throughout the Indo-Pacific. *Mar. Ecol. Prog. Ser.* **500**, 1–9 (2014).
- 538 32. Peters, E., Oprandy, J. & Yevich, P. Possible causal agent of "white band  
539 disease" in Caribbean acroporid corals. *J. Invertebr. Pathol.* **396**, 394–396 (1983).
- 540 33. Peters, E. A survey of cellular reactions to environmental stress and disease in  
541 Caribbean scleractinian corals. *Helgol Meeresunters* **137**, 113–137 (1984).
- 542 34. Ainsworth, T. & Hoegh-Guldberg, O. Bacterial communities closely  
543 associated with coral tissues vary under experimental and natural reef conditions and  
544 thermal stress. *Aquat. Biol.* **4**, 289–296 (2009).
- 545 35. Neave, M. J. *et al.* Differential specificity between closely related corals and  
546 abundant *Endozoicomonas* endosymbionts across global scales. *ISME J.* (2016).  
547 doi:10.1038/ismej.2016.95
- 548 36. Work, T. M. & Aeby, G. S. Pathology of tissue loss (white syndrome) in  
549 *Acropora* sp. corals from the Central Pacific. *J. Invertebr. Pathol.* **107**, 127–31  
550 (2011).
- 551 37. Wada, N. *et al.* *In situ* visualization of bacterial populations in coral tissues:  
552 pitfalls and solutions. *PeerJ* **4**, e2424 (2016).
- 553 38. Wilson, A. C. C. & Duncan, R. P. Signatures of host/symbiont genome  
554 coevolution in insect nutritional endosymbioses. *Proc. Natl. Acad. Sci.* **112**, 10255–  
555 10261 (2015).
- 556 39. Kohl, K. D. & Carey, H. V. A place for host–microbe symbiosis in the  
557 comparative physiologist’s toolbox. *J. Exp. Biol.* **219**, 3496–3504 (2016).
- 558 40. Petersen, J. M. *et al.* Chemosynthetic symbionts of marine invertebrate  
559 animals are capable of nitrogen fixation. *Nat. Microbiol.* **2**, 16195 (2017).
- 560 41. Yellowlees, D., Rees, T. A. V. & Leggat, W. Metabolic interactions between  
561 algal symbionts and invertebrate hosts. *Plant Cell Environ.* **31**, 679–694 (2008).
- 562 42. Petrou, K., Nielsen, D. A. & Heraud, P. Single-Cell Biomolecular Analysis of  
563 Coral Algal Symbionts Reveals Opposing Metabolic Responses to Heat Stress and  
564 Expulsion. *Front. Mar. Sci.* **5**, (2018).

- 565 43. Tada, K., Sakai, K., Nakano, Y., Takemura, A. & Montani, S. Size-  
566 fractionated phytoplankton biomass in coral reef waters off Sesoko Island, Okinawa,  
567 Japan. *J. Plankton Res.* **25**, 991–997 (2003).
- 568 44. Tanaka, Y. Nutrient uptake by reef building corals and the ecophysiological  
569 effects. *Oceanogr. Jpn.* 101-117 (in Japanese) (2012).
- 570 45. Brodie, J. E., Devlin, M., Haynes, D. & Waterhouse, J. Assessment of the  
571 eutrophication status of the Great Barrier Reef lagoon (Australia). *Biogeochemistry*  
572 **106**, 281–302 (2011).
- 573 46. Berkelmans, R., Weeks, S. J. & Steinberga, C. R. Upwelling linked to warm  
574 summers and bleaching on the Great Barrier Reef. *Limnol. Oceanogr.* **55**, 2634–2644  
575 (2010).
- 576 47. Bourne, D., Iida, Y., Uthicke, S. & Smith-Keune, C. Changes in coral-  
577 associated microbial communities during a bleaching event. *ISME J.* **2**, 350–363  
578 (2007).
- 579 48. Dinsdale, E. a *et al.* Microbial ecology of four coral atolls in the Northern  
580 Line Islands. *PloS One* **3**, e1584–e1584 (2008).
- 581 49. Vega Thurber, R. L. *et al.* Metagenomic analysis of stressed coral holobionts.  
582 *Environ. Microbiol.* **11**, 2148–2163 (2009).
- 583 50. Littman, R., Willis, B. L. & Bourne, D. G. Metagenomic analysis of the coral  
584 holobiont during a natural bleaching event on the Great Barrier Reef. *Environ.*  
585 *Microbiol. Rep.* **3**, 651–660 (2011).
- 586 51. Kelly, L. W. *et al.* Local genomic adaptation of coral reef-associated  
587 microbiomes to gradients of natural variability and anthropogenic stressors. *Proc.*  
588 *Natl. Acad. Sci.* **111**, 10227–10232 (2014).
- 589 52. Shiu, J.-H. *et al.* Dynamics of coral-associated bacterial communities  
590 acclimated to temperature stress based on recent thermal history. *Sci. Rep.* **7**, 14933  
591 (2017).
- 592 53. Glasl, B., Webster, N. S. & Bourne, D. G. Microbial indicators as a diagnostic  
593 tool for assessing water quality and climate stress in coral reef ecosystems. *Mar.*  
594 *Biol.* **164**, 91 (2017).
- 595 54. Garren, M. & Azam, F. New Method for Counting Bacteria Associated with  
596 Coral Mucus. *Appl. Environ. Microbiol.* **76**, 6128–6128 (2010).

- 597 55. Garren, M. & Azam, F. Corals shed bacteria as a potential mechanism of  
598 resilience to organic matter enrichment. *ISME J.* **6**, 1159–1165 (2012).
- 599 56. Sudek, M., Work, T. M., Aeby, G. S. & Davy, S. K. Histological observations  
600 in the Hawaiian reef coral, *Porites compressa*, affected by Porites bleaching with  
601 tissue loss. *J. Invertebr. Pathol.* **111**, 121–125 (2012).
- 602 57. Bayer, T. *et al.* The Microbiome of the Red Sea Coral *Stylophora pistillata* Is  
603 Dominated by Tissue-Associated Endozoicomonas Bacteria. *Appl. Environ.*  
604 *Microbiol.* **79**, 4759–4762 (2013).
- 605 58. van Teeseling, M. C. F., de Pedro, M. A. & Cava, F. Determinants of  
606 Bacterial Morphology: From Fundamentals to Possibilities for Antimicrobial  
607 Targeting. *Front. Microbiol.* **8**, (2017).
- 608 59. Amann, R. I., Ludwig, W. & Schleifer, K. H. Phylogenetic identification and  
609 in situ detection of individual microbial cells without cultivation. *Microbiol Mol Biol*  
610 *Rev* **59**, 143–169 (1995).
- 611 60. Wagner, M., Horn, M. & Daims, H. Fluorescence in situ hybridisation for the  
612 identification and characterisation of prokaryotes. *Curr. Opin. Microbiol.* **6**, 302–309  
613 (2003).
- 614 61. Bouvier, T. & del Giorgio, P. A. Factors influencing the detection of bacterial  
615 cells using fluorescence in situ hybridization (FISH): A quantitative review of  
616 published reports. *FEMS Microbiol. Ecol.* **44**, 3–15 (2003).
- 617 62. Prophet, E. B. *Laboratory methods in histotechnology.* (Amer Registry of  
618 Pathology, 1992).
- 619 63. Riou, V., Périot, M. & Biegala, I. C. Specificity Re-evaluation of  
620 Oligonucleotide Probes for the Detection of Marine Picoplankton by Tyramide  
621 Signal Amplification-Fluorescent In Situ Hybridization. *Front. Microbiol.* **8**, (2017).
- 622 64. Siboni, N., Ben-Dov, E., Sivan, A. & Kushmaro, A. Global distribution and  
623 diversity of coral-associated Archaea and their possible role in the coral holobiont  
624 nitrogen cycle. *Environ. Microbiol.* **10**, 2979–2990 (2008).
- 625 65. Arp, D. J. & Bottomley, P. J. Nitrifiers: more than 100 years from isolation to  
626 genome sequences. *Microbe-Am. Soc. Microbiol.* **1**, 229 (2006).
- 627 66. Feng, G., Sun, W., Zhang, F., Karthik, L. & Li, Z. Inhabitancy of active  
628 Nitrosopumilus-like ammonia-oxidizing archaea and Nitrospira nitrite-oxidizing  
629 bacteria in the sponge *Theonella swinhoei*. *Sci. Rep.* **6**, 24966 (2016).

- 630 67. Wallner, G., Amann, R. & Beisker, W. Optimizing fluorescent in situ  
631 hybridization with rRNA-targeted oligonucleotide probes for flow cytometric  
632 identification of microorganisms. *Cytometry* **14**, 136–43 (1993).
- 633 68. Daims, H., Brühl, A., Amann, R., Schleifer, K. H. & Wagner, M. The  
634 domain-specific probe EUB338 is insufficient for the detection of all Bacteria:  
635 development and evaluation of a more comprehensive probe set. *Syst. Appl.*  
636 *Microbiol.* **22**, 434–44 (1999).
- 637 69. R Core Team. R: A Language and Environment for Statistical Computing.  
638 *Vienna, Austria: R Foundations for Statistical Computing.* (2013).
- 639 70. Signorell, A. DescTools: Tools for descriptive statistics (R package version  
640 0.99.26). *The Comprehensive R Archive Network* (2018).
- 641 71. Wickham, H., François, R., Henry, L., Müller, K. & RStudio. dplyr: a  
642 grammar of data manipulation (R package version 0.7.6). *The Comprehensive R*  
643 *Archive Network* (2018).
- 644 72. Ogle, D., Wheeler, P. & Dinno, A. FSA: Simple Fisheries Stock Assessment  
645 Methods (R package version 0.8.20). *The Comprehensive R Archive Network* (2018).
- 646 73. Sarkar, D. *Lattice: multivariate data visualization with R.* (Springer Science  
647 & Business Media, 2008).
- 648 74. Mangiafico, S. rcompanion: Functions to Support Extension Education  
649 Program Evaluation (R package version 2.0.0). *The Comprehensive R Archive*  
650 *Network* (2018).

651

652

## 653 **Figure legends**

654

655 **Fig. 1 Map showing the locations of five study sites in two countries: (a, b) Sesoko**

656 **Island (SI) in Okinawa, Japan; (a, c) Inner Shelf (IS), Lizard Island (LI) and Outer Shelf**



657 (OS) sites in the Northern Great Barrier Reef; and **(a, d)** Orpheus Island (OI) in the  
658 central Great Barrier Reef, Australia.

659

660 **Fig. 2 Histological appearance, occurrence and density of CAMAs in the coral**

661 *Acropora hyacinthus*. **(a)** Numerous CAMAs (indicated by arrows) are visible in a  
662 histological section stained by hematoxylin and eosin of a colony from Sesoko, Japan.  
663 **(b)** Right panel shows close-up of a CAMA located in a mesentery of a polyp from the  
664 branch sectioned in (a). **(c)** Pie diagrams showing the proportion of colonies sampled  
665 that contained CAMAs at five sites in Japan and Australia. A significantly higher  
666 proportion of Sesoko Is. samples contained CAMAs than samples collected from three  
667 more offshore sites (Lizard Is., Outer Shelf northern GBR site, and Orpheus Is.)

668 (\*\* $p < .005$ ; G test followed by a post-hoc bonferroni). **(d)** Densities of basophilic-  
669 staining (upper graph) or eosinophilic-staining (lower graph) CAMAs at five sites.  
670 Densities of basophilic CAMAs were significantly greater in samples from Sesoko Is.  
671 than in samples from the three offshore sites (Lizard Is., Outer Shelf site, and Orpheus  
672 Is, as were densities in the Inner shelf GBR site compared to the two offshore northern  
673 sector sites (\*\*  $p < .005$ ; Kruskal-Wallis test, with Dunn's multiple comparison followed  
674 by a bonferroni correction). Scale bars indicate 600  $\mu\text{m}$  **(a)**, 50  $\mu\text{m}$  **(b)** and 10  $\mu\text{m}$  **(d)**.

675

676 **Fig. 3 Distribution of CAMAs within six anatomical regions of the coral *Acropora***

677 *hyacinthus* collected from five sites in Japan and Australia. **(a)** Schematic drawing  
678 of a coral polyp showing the six anatomical regions examined microscopically (same



679 colour coding used in b) and c)). **b)** Pie charts showing the distribution of CAMAs  
680 among six anatomical regions in samples from the five sites. **(c)** Dot plots comparing  
681 the size of CAMAs among anatomical regions for each location. N=307 CAMAs  
682 detected in tissues treated with FISH.

683

684 **Fig. 4 Morphological variation in bacteria housed within different CAMAs.** Note  
685 that bacteria within each CAMA are morphologically similar. Dotted lines (in **a–d** and  
686 **i–l**) delineate regions magnified in close-up images (**e–h** and **m–p**). Overall, five  
687 bacterial morphologies were detected: rod-like (**a, e**), pleomorphic (**b, f**), long rods (**c,**  
688 **g**), filamentous-like (**d, h**), rod-shaped with spore-like structures (**i–j** and **m–n**), and  
689 putative amorphous masses (**k–l** and **o–p**). Scale bars indicate 10  $\mu\text{m}$  (**a–d** and **i–l**) and 5  
690  $\mu\text{m}$  (**e–h** and **m–p**).

691

692 **Fig. 5 Three-dimensional (3D) images of CAMAs (red) within a tentacle of the**  
693 **coral *Acropora hyacinthus*, as visualized using FISH. (a)** Section of tentacle showing  
694 localization of two types of CAMAs (10x magnification). **(b)** Single aggregation of  
695 bacteria in a large structure within the ectoderm (40x magnification; composed of 92 z-  
696 stack images). **(c)** Multiple aggregations of bacteria in smaller structures within the  
697 gastrodermis (40x magnification; composed of 56 z-stack images). 3D rendering of  
698 CAMAs (**d** and **e**) reconstructed from 3D images in **b** and **c**. Coral tissue and  
699 *Symbiodiniaceae* appear as blue and green structures, respectively.

700

701 **Suppl. Fig. 1 Calculating the area of CAMAs.** (a) A single large CAMA, comprised  
702 of rod-shaped bacteria, was calculated to be  $175.7 \mu\text{m}^2$  in cross-sectional area from 3D  
703 images. (b) Smaller, numerous aggregations were calculated to be, on average,  $22.6 \pm 4.2$   
704  $\mu\text{m}^2$  in cross-sectional area ( $n = 8$ ). Scale bars indicate  $20 \mu\text{m}$ .

705

706 **Suppl. Fig. 2 Schematic drawing showing how coral fragments were sectioned for**

707 **H&E staining and FISH.** In total, nine sections were collected from each sample

708 (three sets of sections, each set comprised of three serial sections). \*1: Distance between

709 each set was  $100 \mu\text{m}$ .

710

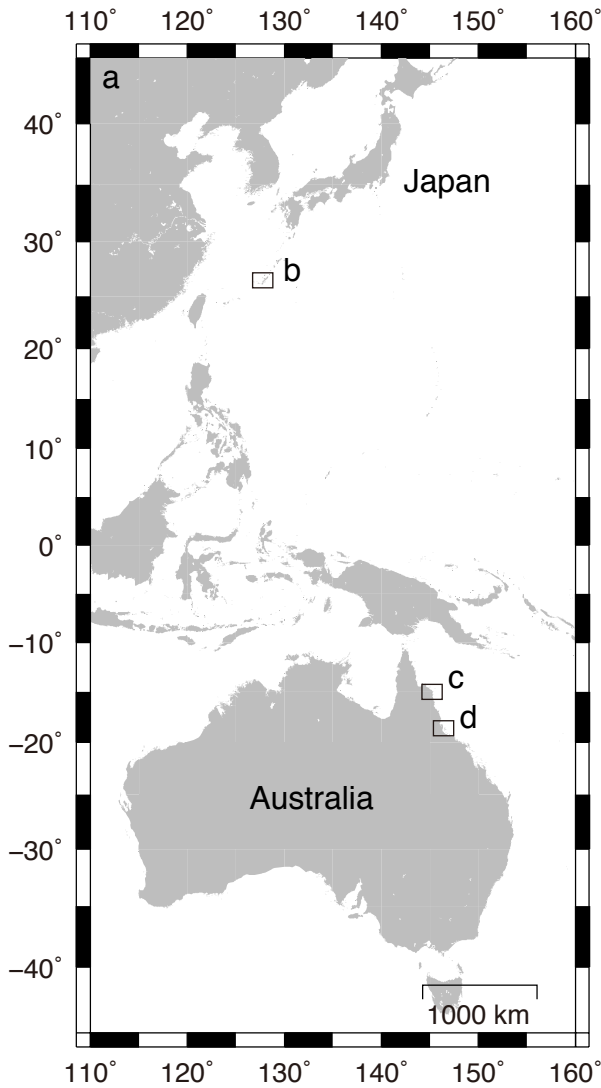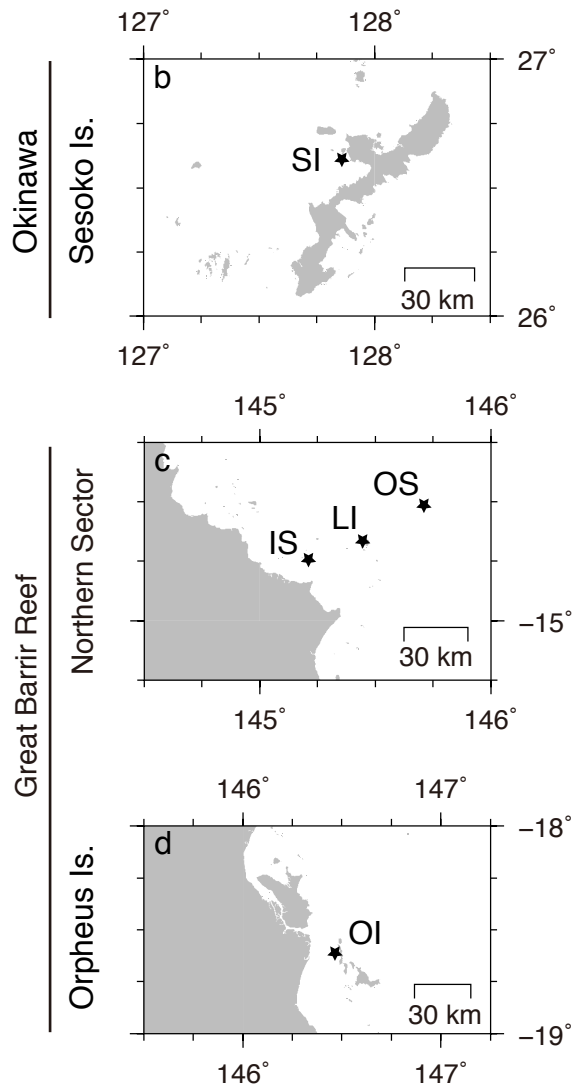

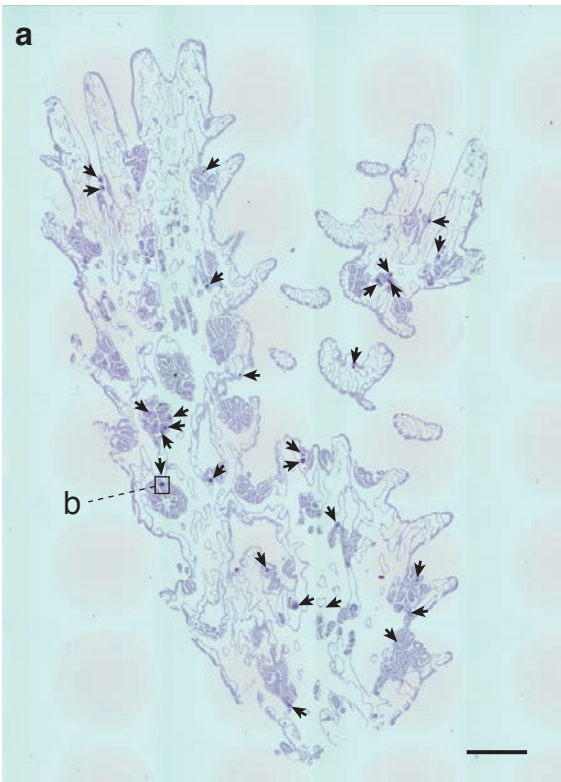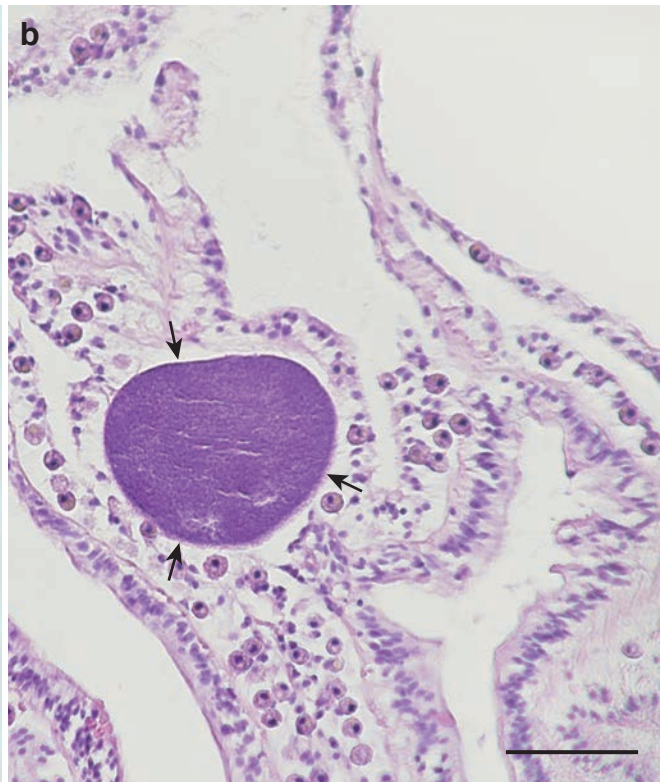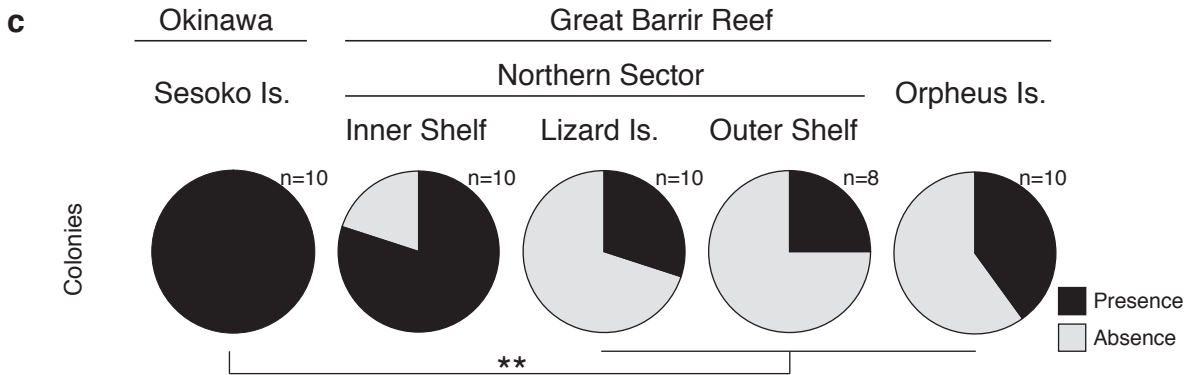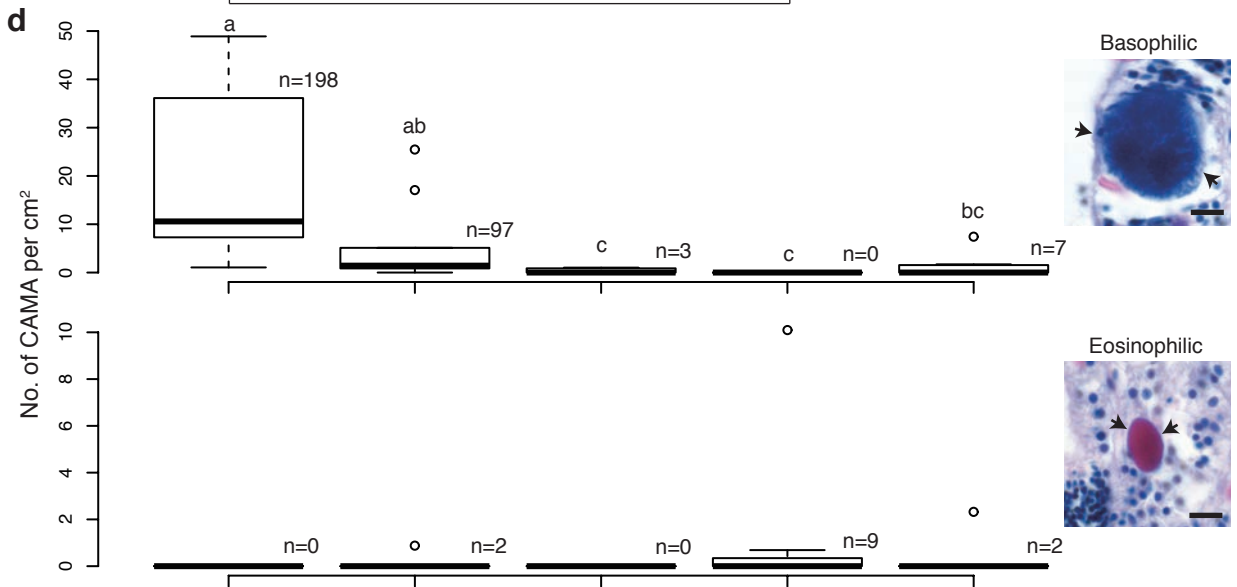

**a**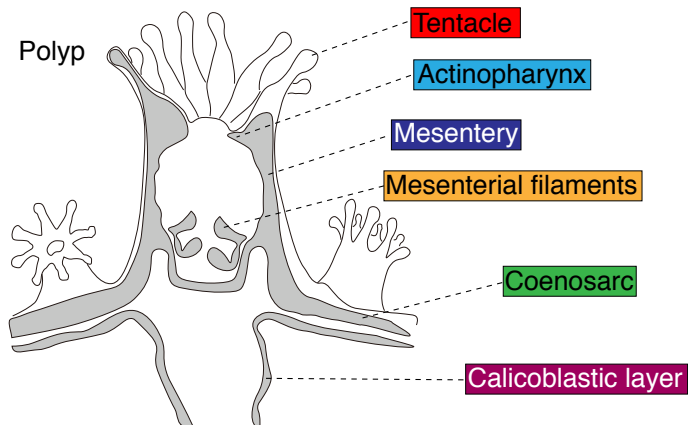**b**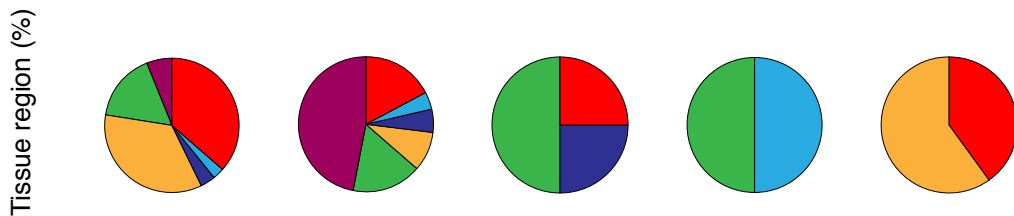**c**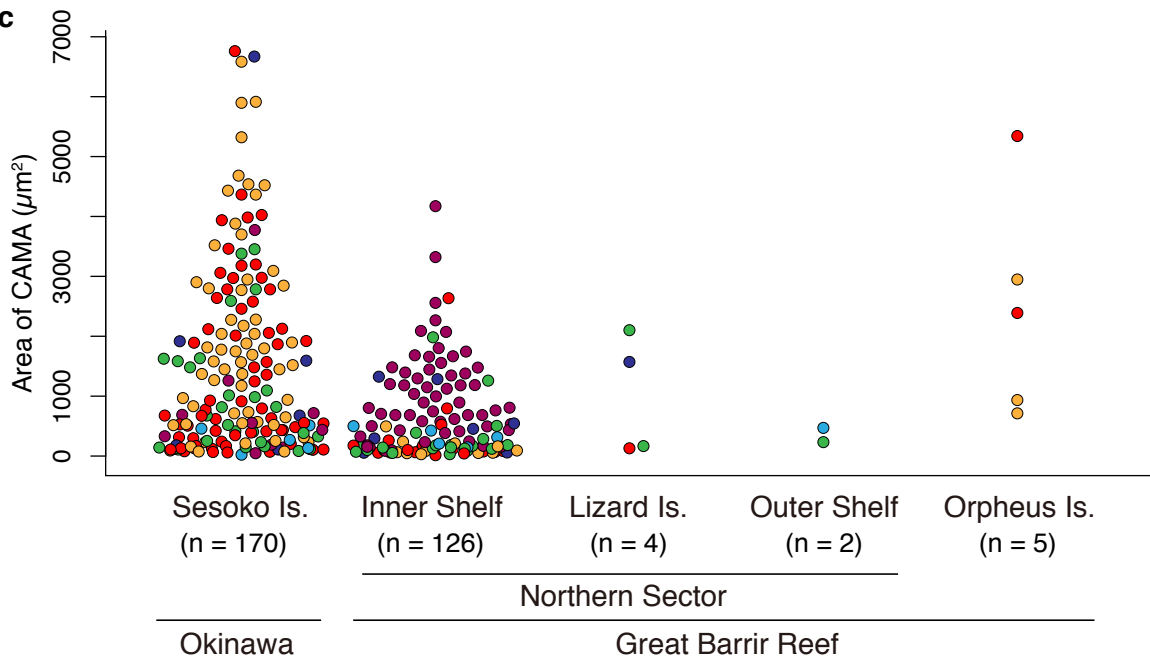

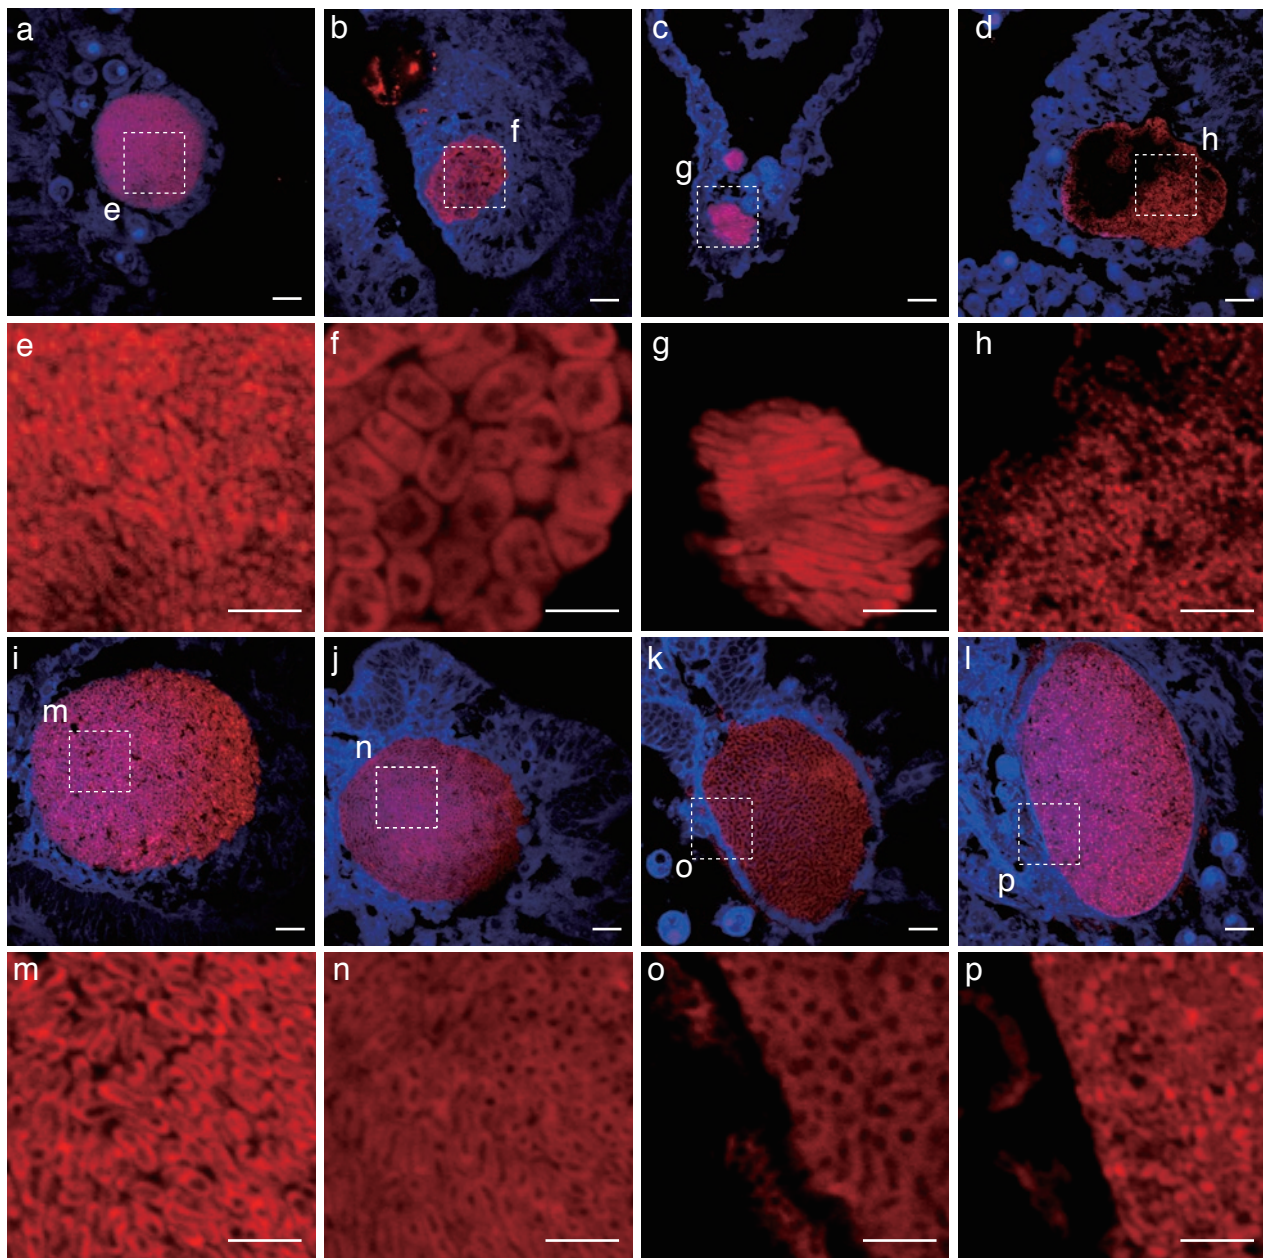



**a**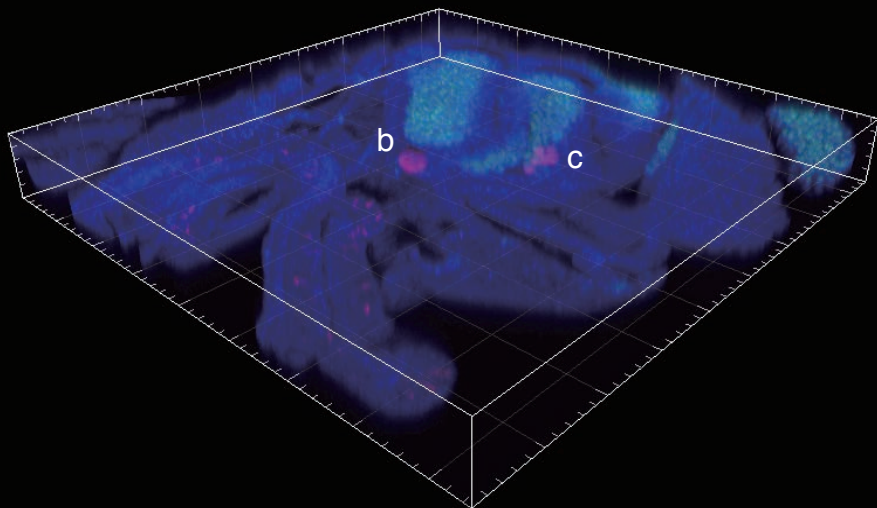**b**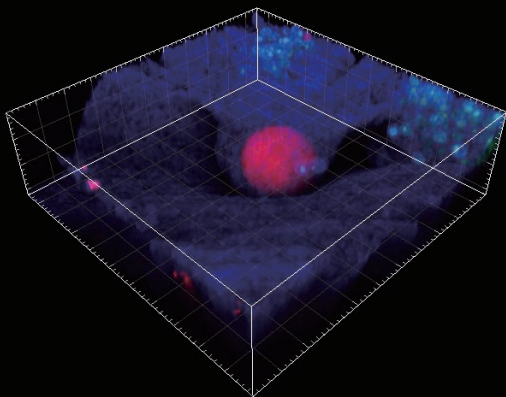**c**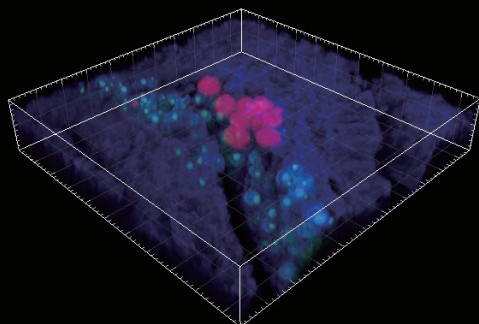**d**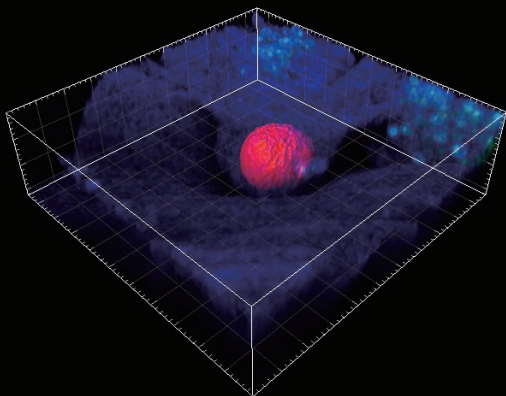**e**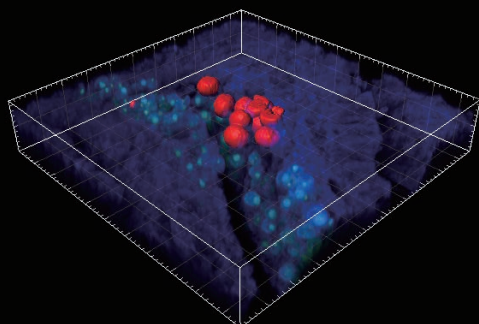

Source: https://www.biorxiv.org/content/10.1101/576488v2.full.pdf
